# Supplementary material for: Comparative Studies on the Organogel Formation of a Polyester in Three Different Base Oils by X-ray Analysis, Rheology and Infrared Spectroscopy
Source: MDPI journal article supplement (doi:10.3390/gels9090696), 2023-08-29
Supplement: s1 [file s1]

# Comparative Studies on the Organogel Formation of a Polyester in Three Different Base Oils by X-ray Analysis, Rheology and Infrared Spectroscopy

Max Jopen <sup>1</sup>, Michael Paulus <sup>2</sup>, Christian Sternemann <sup>2</sup>, Patrick Degen <sup>1</sup> and Ralf Weberskirch <sup>3,\*</sup>

<sup>1</sup> Carl Bechem GmbH, Weststraße 120, 58089 Hagen, Germany; jopen@bechem.de (M.J.); degen@bechem.de (P.D.)

<sup>2</sup> Fakultät Physik/DELTA, Technische Universität Dortmund, 44221 Dortmund, Germany; michael.paulus@tu-dortmund.de (M.P.); christian.sternemann@tu-dortmund.de (C.S.)

<sup>3</sup> Fakultät für Chemie und Chemische Biologie, Technische Universität Dortmund, Otto-Hahn-Str. 6, 44227 Dortmund, Germany

\* Correspondence: ralf.weberskirch@tu-dortmund.de

| Content                                                                                      | page |
|----------------------------------------------------------------------------------------------|------|
| 1. <sup>1</sup> H NMR data of polyester thickener ( <b>PT</b> ) after synthesis; Fig. S1- S2 | 2    |
| 2. SAXS measurement data of <b>PT</b> , Fig. S3-S4                                           | 3    |

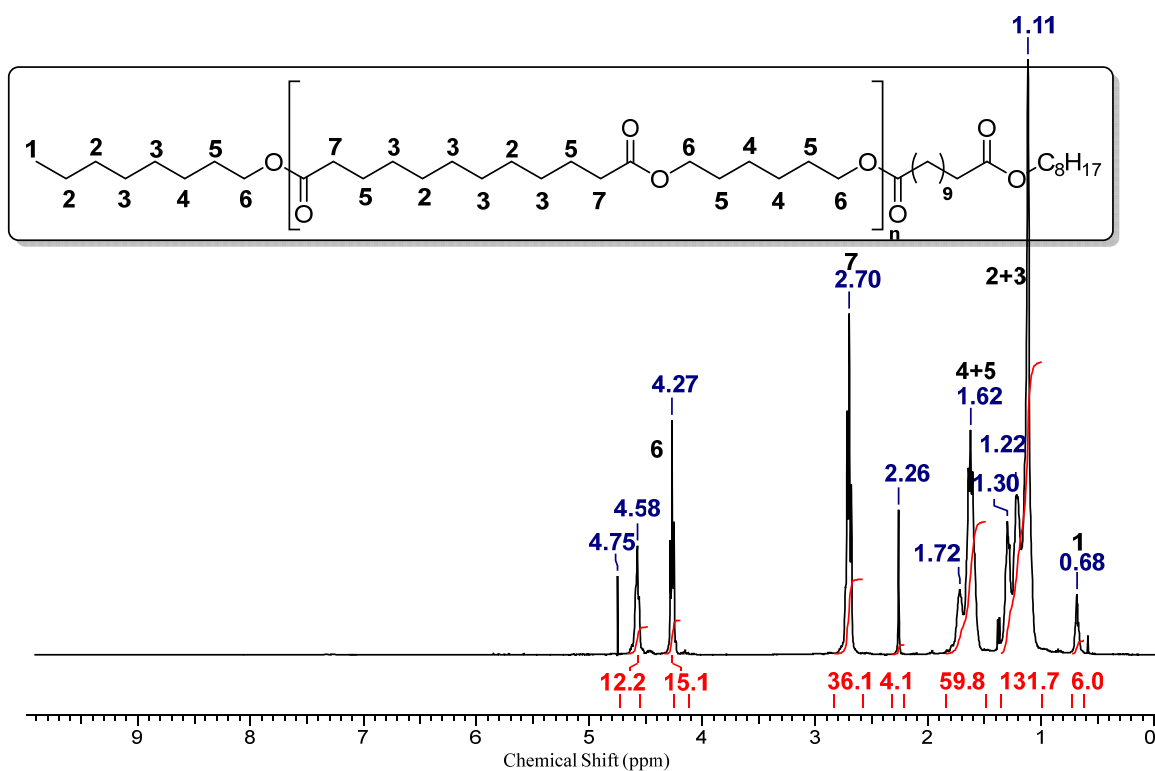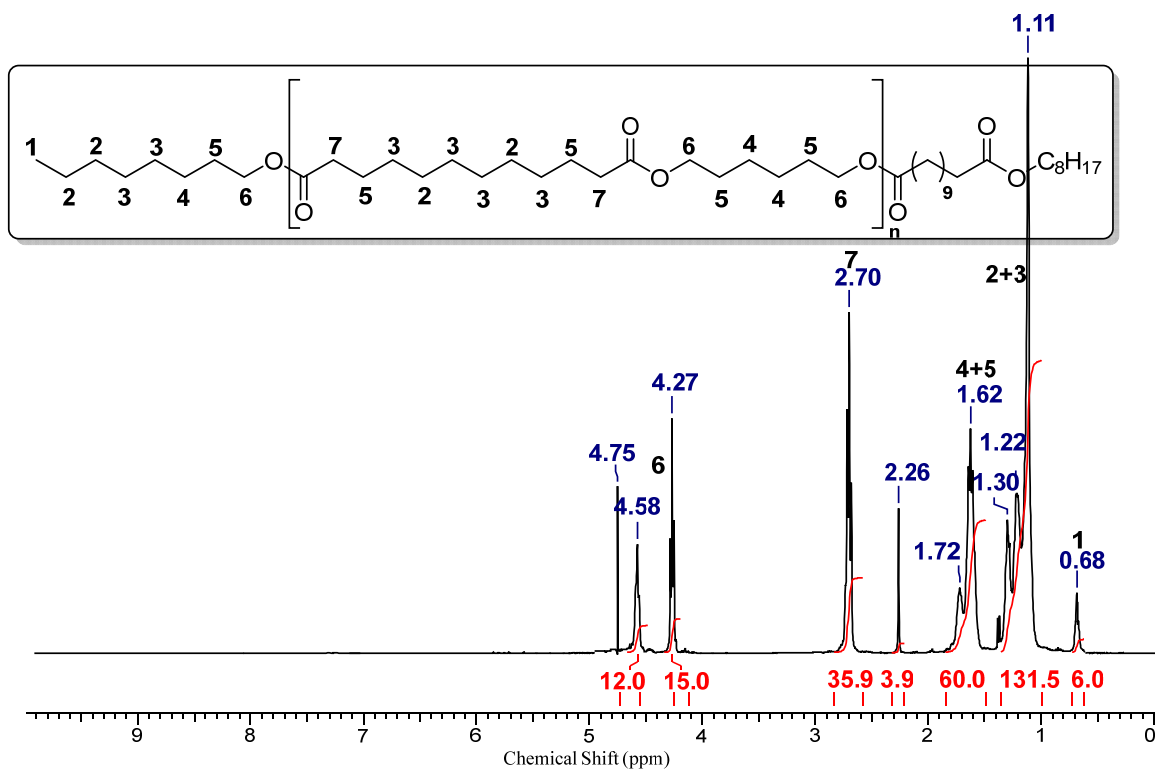

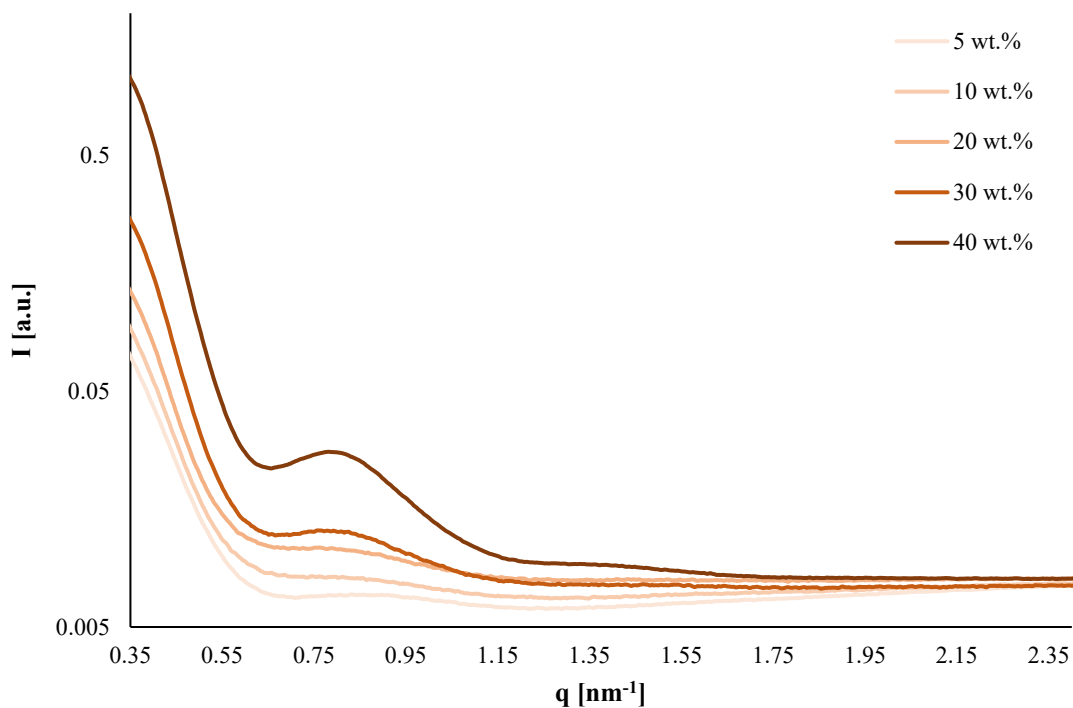

**Figure S3:** SAXS measurements for **PT** in concentration series of **PT** in **CO**.

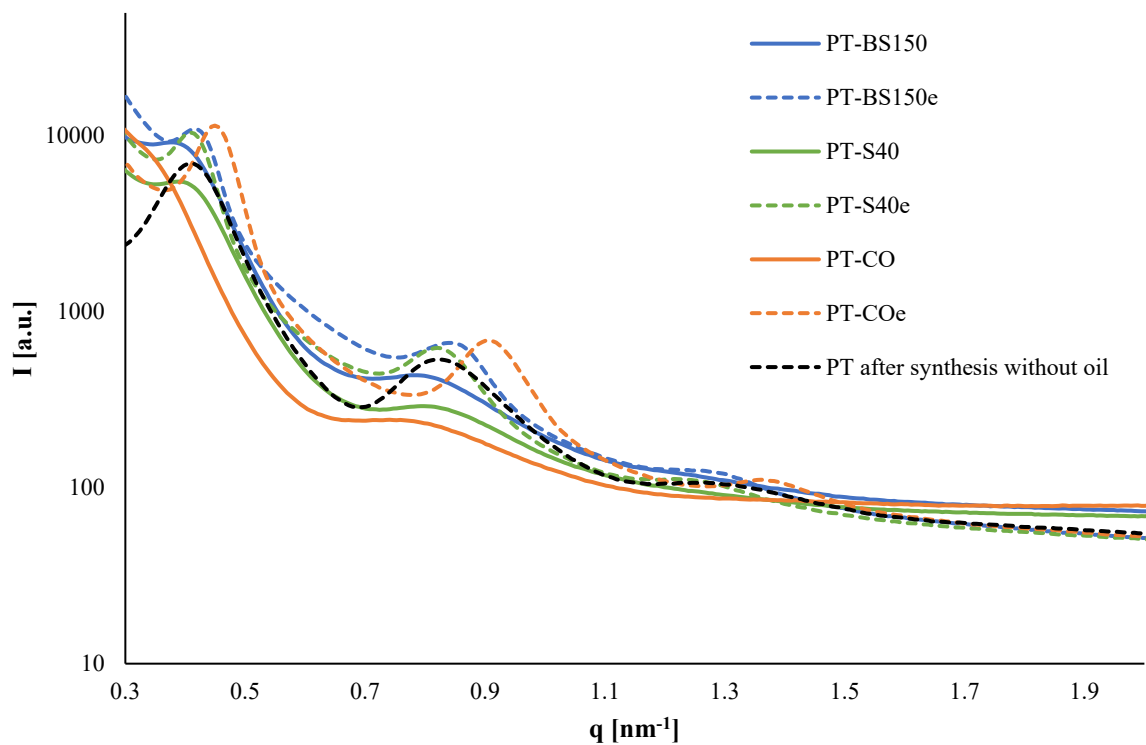

**Figure S4:** SAXS measurements for **PT** in different base oils **BS150**, **S40** and **CO** and extracted thickeners **e**.
